# Supplementary material for: Massive lateral transfer of genes encoding plant cell wall-degrading enzymes to the mycoparasitic fungus Trichoderma from its plant-associated hosts
Source: PubMed Central journal article supplement (PMC5908196; doi:10.1371/journal.pgen.1007322), 2018-04-09

S3 Figure: Mycoparasitism of *Trichoderma*.A. Allomycoparasitism of *Trichoderma* spp. and *E. weberi* on *Lentinula edodes*.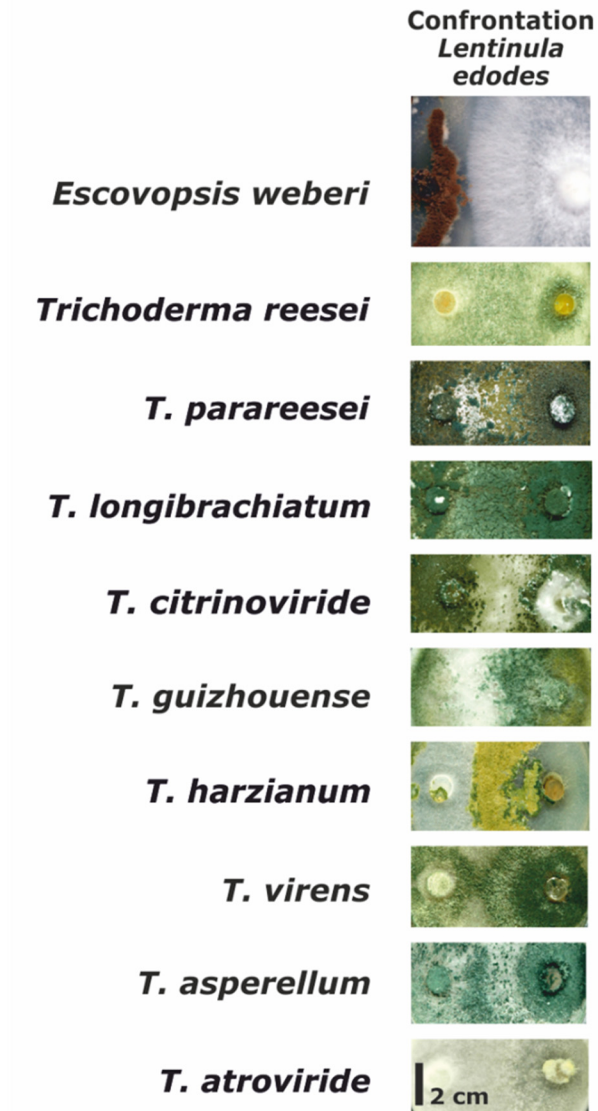

**B. Allomycoparasitism of *Trichoderma* and *E. weberi* on *Leucoagaricus gongylophorus*. The dashed lines indicate growth of the host fungus as deduced from back sides of the plates.**

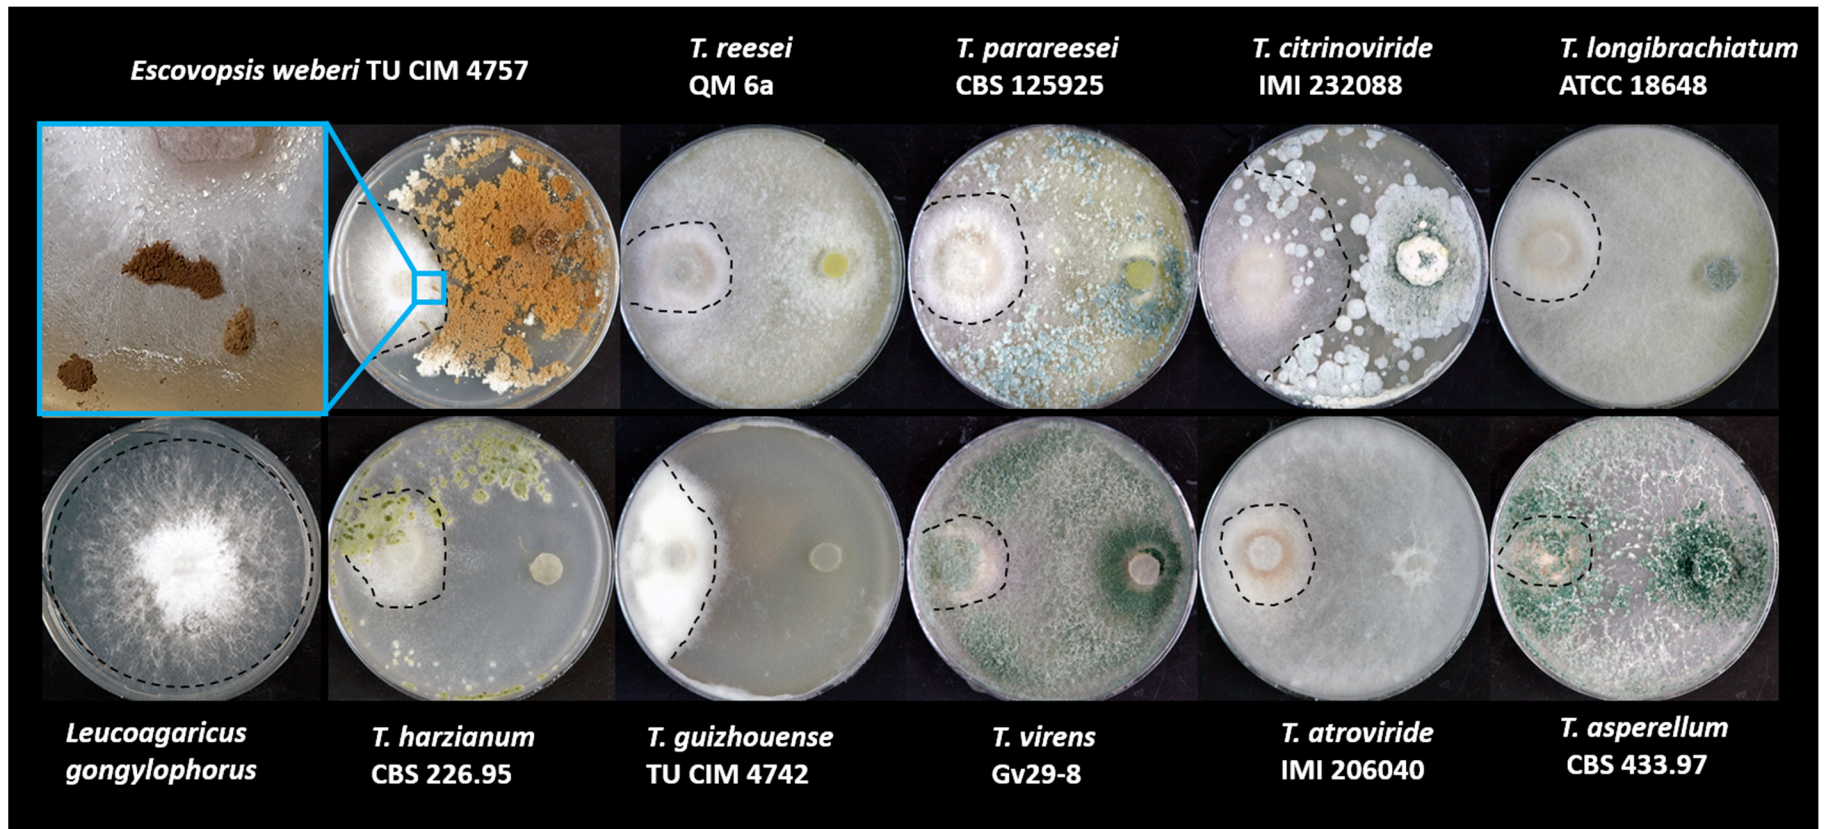

- C. Set up for the microscopic investigation of *Trichoderma* (right) parasitism on *Pestalotiopsis fici* (left). 2 cm<sup>2</sup> agar plugs were located between a sterile microscopy glass slide and a 5 x 2.5 cm sterile glass cover slip and aseptically inoculated with spores of two partner fungi, respectively, using a microbiological needle. Inoculated cultures were maintained at 28°C in wet chamber until hyphal contact. Microscopic investigation was done for hyphae on the cover slip surface.

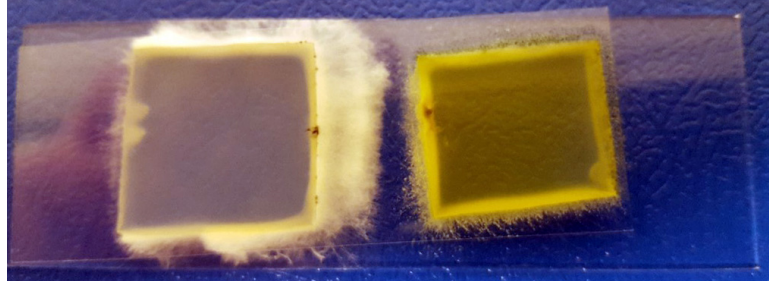

D. Antagonism of selected *Trichoderma* species on *Penicillium* spp. Dashed line indicates growth of the host fungus.

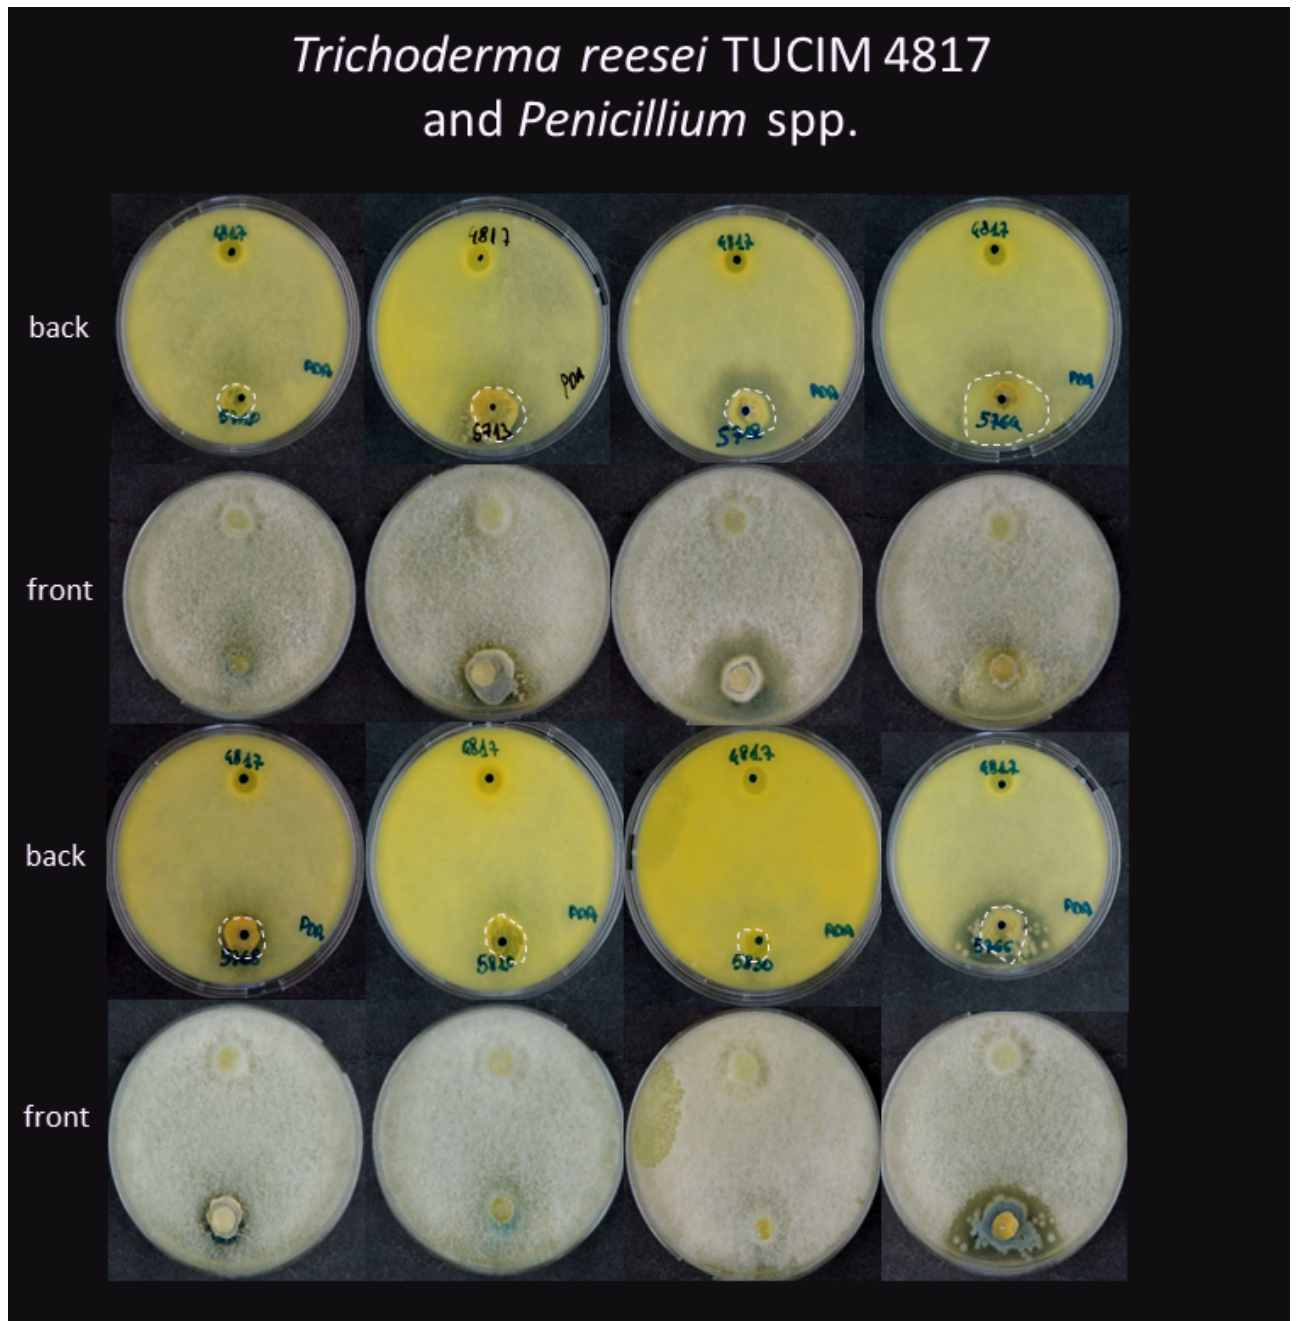



# *Trichoderma guizhouense* TUCIM 4741 and *Penicillium* spp.

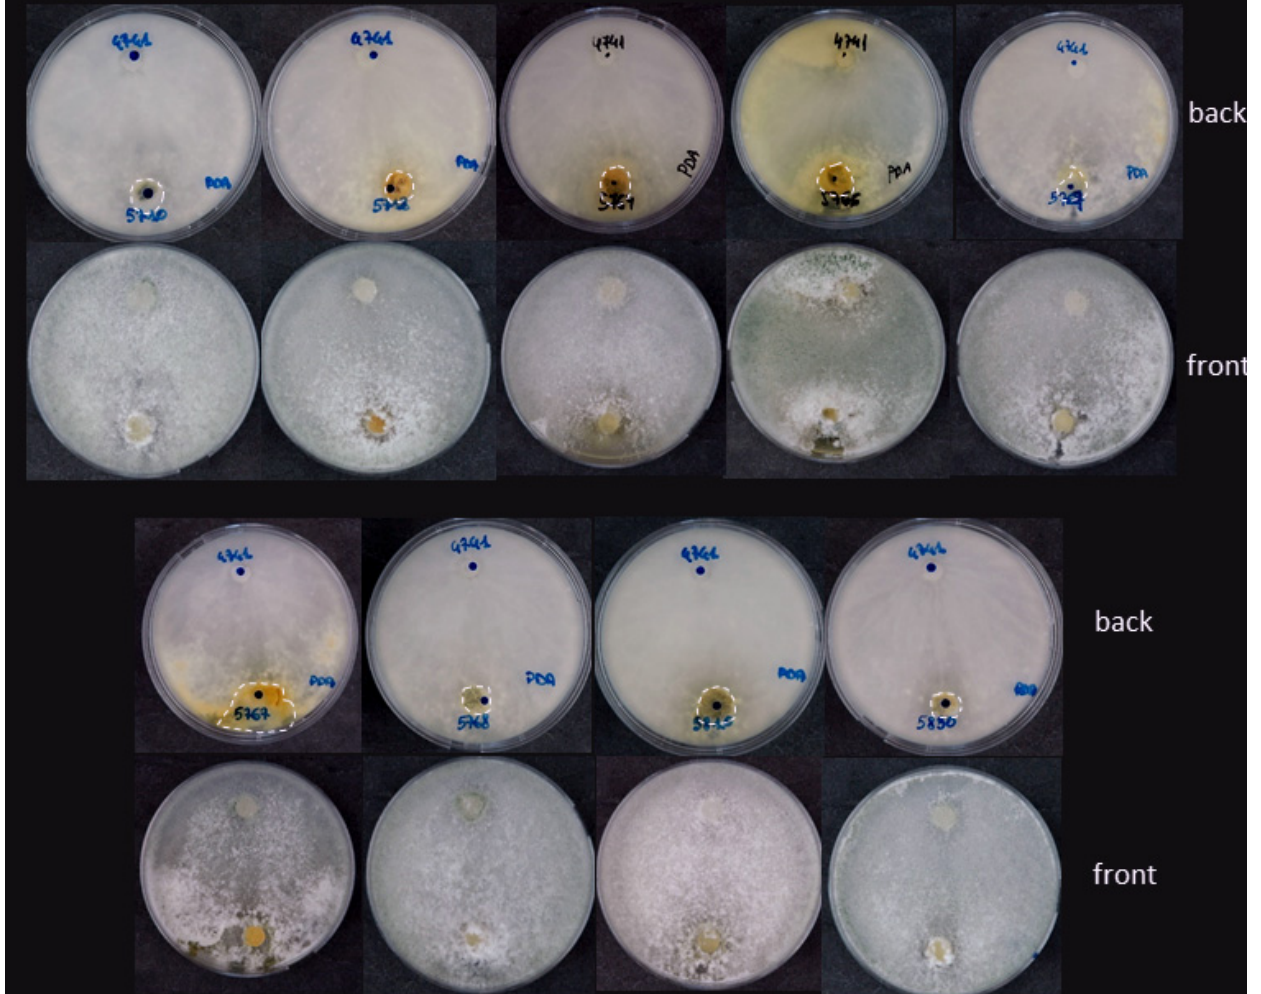

Supplement: pgen.1007322.s011.pdf [file pgen.1007322.s011.pdf]
