# Supplementary material for: Massive lateral transfer of genes encoding plant cell wall-degrading enzymes to the mycoparasitic fungus Trichoderma from its plant-associated hosts
Source: PLoS Genet. 2018 Apr 9;14(4):e1007322. doi: 10.1371/journal.pgen.1007322 (PMC5908196; doi:10.1371/journal.pgen.1007322)
Supplement: S1 Table — (XLSX) [file pgen.1007322.s002.xlsx]

## Sheet: S1 Table 
S1 Table: Properties of fungal genomes used in this study.
Order	Family	Section in the genus Trichoderma	Species	Strain	NCBI accession	Web link	Genome size [Mbp]	Coverage [x]	Assembly gaps [%]	No.of gene models	No.of scaffolds	Ref*
Hypocreales	Hycocreaceae	Longibrachiatum	Trichoderma reesei	Qm 6a	PRJNA225530	Web link						1
			T. parareesei	CBS 125925	LFMI00000000	n.a.						2
			T. longibrachiatum	ATCC 18648	MBDJ00000000	web link	32.2	60	3.2	10938	130	this study
			T. citrinoviride	N/A	MBDI00000000	Web link	33.22	63	0.2	9737	533
		Pachibasium	T. guizhouense	NJAU 4742	LVVK00000000	n.a.	38.29	24	0.0922	11255	63
			T. harzianum	CBS 226.95	MBGI00000000	Web link	40.98	120	0.04	14095	532
			T. virens	Gv29-8	PRJNA264113	Web link						3
		Trichoderma	T. asperellum	CBS 433.97	MBGH00000000	Web link	37.5	120	0.06	12586	419	this study
			T. atroviride	IMI 206040	PRJNA264112	Web link						3
			Escovopsis weberi	CC031208-10	PRJNA253870	Web link						4
	Clavici- pitaceae		Metarhizium acridium	CQMa102	PRJNA38715							5
			M. robertsii	ARSEF 23	PRJNA245140
			Calviceps purpurea	20.1	PRJEA76493							6
	Ophio- cordyci- pitaceae		Ophiocordyceps sinensis	CO18	PRJNA59569							7
	Cordyci- pitaceae		Beauveria bassiana	ARSEF 2860	PRJNA225503							8
			Cordyceps militaris	CM01	PRJNA225510							9
	Nectriaceae		Fusarium graminearum	PH-1	AACM00000000							10
			F. pseudograminearum	CS3096	AFNW00000000							11
			F. oxysporum f. sp. lycopersici	4287	PRJNA342688							12
			F. fujikuroi	IMI 58289	PRJEB185							13
			Nectria haematococca	mpVI 77-13-4	PRJNA51499							14
Sordariales	Sordariaceae		Neurospora crassa	OR74a	AABX00000000							15
	Chaetomiaceae		Chaetomium globosum	CBS 148.51	PRJNA12795							16
n.a. - not available
*References
1	Martinez, D. et al. Genome sequencing and analysis of the biomass-degrading fungus Trichoderma reesei (syn. Hypocrea jecorina). Nat. Biotechnol. 26, 553–560 (2008).
2	Yang, D. et al. Genome Sequence and Annotation of Trichoderma parareesei, the Ancestor of the Cellulase Producer Trichoderma reesei. Genome Announc. 3, e00885-15 (2015).
3	Kubicek, C. P. et al. Comparative genome sequence analysis underscores mycoparasitism as the ancestral life style of Trichoderma. Genome Biol. 12, R40 (2011).
4	de Man, T. J. B. et al. Small genome of the fungus Escovopsis weberi, a specialized disease agent of ant agriculture. Proc. Natl. Acad. Sci. U. S. A. 113, 3567–3572 (2016).
5	Gao, Q. et al. Genome Sequencing and Comparative Transcriptomics of the Model Entomopathogenic Fungi Metarhizium anisopliae and M. acridum. PLoS Genet. 7, e1001264 (2011).
6	Schardl, C. L. et al. Plant-Symbiotic Fungi as Chemical Engineers: Multi-Genome Analysis of the Clavicipitaceae Reveals Dynamics of Alkaloid Loci. PLoS Genet. 9, e1003323 (2013).
7	Hu, X. et al. Genome survey uncovers the secrets of sex and lifestyle in caterpillar fungus. Chin. Sci. Bull. 58, 2846–2854 (2013).
8	Xiao, G. et al. Genomic perspectives on the evolution of fungal entomopathogenicity in Beauveria bassiana. Sci. Rep. 2, 483 (2012).
9	Zheng, P. et al. Genome sequence of the insect pathogenic fungus Cordyceps militaris, a valued traditional chinese medicine. Genome Biol. 12, R116 (2011).
10	Cuomo, C. A. et al. The Fusarium graminearum genome reveals a link between localized polymorphism and pathogen specialization. Science 317, 1400–1402 (2007).
11	Gardiner, D. M., Stiller, J. & Kazan, K. Genome Sequence of Fusarium graminearum Isolate CS3005. Genome Announc. 2, (2014).
12	Ma, L.-J. et al. Comparative genomics reveals mobile pathogenicity chromosomes in Fusarium. Nature 464, 367–373 (2010).
13	Wiemann, P. et al. Deciphering the cryptic genome: genome-wide analyses of the rice pathogen Fusarium fujikuroi reveal complex regulation of secondary metabolism and novel metabolites. PLoS Pathog. 9, e1003475 (2013).
14	Coleman, J. J. et al. The Genome of Nectria haematococca: Contribution of Supernumerary Chromosomes to Gene Expansion. PLoS Genet 5, e1000618 (2009).
15	Galagan, J. E. et al. The genome sequence of the filamentous fungus Neurospora crassa. Nature 422, 859–868 (2003).
16	Cuomo, C. A., Untereiner, W. A., Ma, L.-J., Grabherr, M. & Birren, B. W. Draft Genome Sequence of the Cellulolytic Fungus Chaetomium globosum. Genome Announc. 3, (2015).
