# Supplementary material for: Massive lateral transfer of genes encoding plant cell wall-degrading enzymes to the mycoparasitic fungus Trichoderma from its plant-associated hosts
Source: PLoS Genet. 2018 Apr 9;14(4):e1007322. doi: 10.1371/journal.pgen.1007322 (PMC5908196; doi:10.1371/journal.pgen.1007322)
Supplement: S3 Table — A. NCBI Accession numbers of genes composing the pcwdCAZome of Trichoderma and regulatory proteins analyzed in this study. B. Distribution of pcwdCAZymes in GH families in Hypocreales. C: Parameters of phylogenetic analyses of individual proteins from Trichoderma pcwdCAZome. (XLSX) [file pgen.1007322.s004.xlsx]

## Sheet: Content
S3 Table: Composition and evolution of pcwdCAZome of Trichoderma and related fungi.
S3A: Accession numbers of genes composing the pcwdCAZome of Trichoderma and regulatory proteins analyzed in this study
S3B: Distribution of pcwdCAZymes in GH families in Hypocreales
S3C: Parameters of phylogenetic analyses of individual proteins from Trichoderma pcwCAZome

## Sheet:  S3A Table
S3A Table. Accession numbers of genes composing the pcwdCAZome of Trichoderma and regulatory proteins analyzed in this study
Glycosyl hydrolase (GH) families	EC number	T. parareesei	T. reesei	T. longibrachiatum	T. citrinoviride	T. guizhouense	T. harzianum	T. virens	T. asperellum	T. atroviride
		CBS 125925	Qm 6a	ATCC 18648	IMI 232088	NJAU 4742	CBS 226.95	Gv29-8	CBS 433.97	IMI 206040
		v1.0	v2.0	v1.0	v4.0	v1.0	v1.0	v2.0	v1.0	v2.0
Total		69	68	66	70	92	99	96	91	95
Cellulases
GH6 Cellobiohydrolase CEL6	EC 3.2.1.91	g11067/OTA06465.1	Trire2:34210	Trilo3:1402014	Trici4:1168162	S00019_171/OPB43438.1	Triha1:50869	Trivi2:78675	Trias1:84972	Triat2:44894
GH7 Endo-ß-1,4-glucanase CEL7B	EC 3.2.1.4	g4652/OTA02599.1	Trire2:122081	Trilo3:1404183	Trici4:1160011	S00010_1/OPB45635.1	Triha1:512303	Trivi2:182161	Trias1:57926	Triat2:161114
GH7 Cellobiohydrolase CEL7A	EC 3.2.1.91	g2117/OTA01085.1	Trire2:123989	Trilo3:1332474	Trici4:1142876	S00010_546/ OPB45635.1	Triha1:7497	Trivi2:90504	Trias1:46985	Triat2:274180
GH5 Endo-ß-1,4-glucanase Clade A	EC 3.2.1.4	g8421/OTA04876.1	Trire2:82616	Trilo3:20393	Trici4:59807	S00008_343/OPB46276.1	Triha1:6750	Trivi2:89797	Trias1:201193	Triat2:46284
GH5 Endo-ß-1,4-glucanase Clade B	EC 3.2.1.4	g11076/OTA06472.1	Trire2:120312	Trilo3:54171	Trici4:52720	S00019_164/OPB43431.1	Triha1:441083	Trivi2:76400	Trias1:356720	Triat2:314392
		-	-	-	-	S00005_58/OPB37031.1	Triha1:14278	Trivi2:35701	Trias1:61451	Triat2:221999
GH5 Endo-ß-1,4-glucanase Clade C	EC 3.2.1.4	g12771/OTA07499.1	Trire2:53731	Trilo3:1326226	Trici4:1127792	S00004_204/OPB42102.1	Triha1:80467	Trivi2:72072	Trias1:56064	Triat2:81867
GH12 Endo-ß-1,4-glucanase Clade A	EC 3.2.1.4	g14705/OTA08676.1	Trire2:123232	Trilo3:1394562	Trici4:1172366	S00011_236/OPB41394.1	Triha1:91916	Trivi2:42536	Trias1:177701	Triat2:44429
		-	-	-	-	S00004_689/OPB42586.1	Triha1:112585	Trivi2:224618	-	-
		-	-	-	-	-	-	Trivi2:28149	Trias1:139147	Triat2:48476
GH12 Endo-ß-1,4-glucanase Clade B	EC 3.2.1.4	g8925/OTA05188.1	Trire2:77284	Trilo3:1390457	Trici4:1155840	S00005_670/OPB37643.1	Triha1:362575	Trivi2:216443	Trias1:68178	Triat2:146814
GH45 Endo-ß-1,4-glucanase	EC 3.2.1.4	g1190/OTA00545.1	Trire2:49976	Trilo3:66627	Trici4:1127360	S00001_303/OPB40224.1	Triha1:521975	Trivi2:58412	Trias1:155250	Triat2:297095
		-	-	-	-	-	Triha1:89222	Trivi2:59335	-	-
		-	-	-	-	S0000_935/OPB46594.1	Triha1:21506	-	-	-
ß-glucosidases
GH1 ß-1,4-glucosidase Clade A	EC 3.2.1.21	g14264/OTA08396.1	Trire2:120749	Trilo3:156552	Trici4:21969	-	Triha1:107669	Trivi2:41540	Trias1:63798	Triat2:135426
GH1 ß-1,4-glucosidase Clade B	EC 3.2.1.21	-	-	-	-	-	Triha1:492622	-	-	Triat2:49233
		-	-	-	-	S00021_51/OPB36134.1	Triha1:71414	-	-	Triat2:34040
GH1 ß-1,4-glucosidase Clade C	EC 3.2.1.21	g6118/OTA03492.1	Trire2:22197	Trilo3:276676	Trici4:8387	S00007_549/OPB36831.1	Triha1:113501	Trivi2:74123	Trias1:55643	Triat2:150220
GH3 ß-1,4-glucosidase	EC 3.2.1.21	g1944/OTA00989.1	Trire2:66832	Trilo3:1340882	Trici4:1128946	S00011_154/OPB41313.1	Triha1:92499	Trivi2:195245	Trias1:152362	Triat2:154139
		g8232/OTA04756.1	Trire2:47268	Trilo3:1198076	Trici4:1111544	S00005_271/OPB37244.1	Triha1:77214	Trivi2:188402	Trias1:137007	Triat2:161122
		g2785/OTA01498.1	Trire2:76672	Trilo3:1434316	Trici4:1173360	S00021_168/OPB36250.1	Triha1:71613	Trivi2:83777	Trias1:151383	Triat2:33409
		g4772/OTA02682.1	Trire2:121735	Trilo3:1357095	Trici4:1135350	S00006_114/OPB39055.1	Triha1:504078	Trivi2:74688	Trias1:63437	Triat2:302027
		-	-	-	-	S00011_28/OPB41188.1	Triha1:127782	Trivi2:151663	Trias1:203210	Triat2:42986
		g94/OSZ99894.1	Trire2:76227	Trilo3:45673	Trici4:55497	S00001_912/OPB40831.1	Triha1:487545	Trivi2:90223	Trias1:49486	Triat2:80985
		g10325/OTA05998.1	Trire2:104797	Trilo3:1417739	Trici4:1124887	S00006_530/OPB39470.1	Triha1:504610	Trivi2:41347	Trias1:128828	Triat2:248609
		-	-	-	-	-	-	-	Trias1:154102	-
		-	-	-	-	-	-	Trivi2:222727	-	-
		g5031/OTA02850.1	Trire2:82227	Trilo3:1344583	Trici4:1130330	S00018_149/OPB41826.1	Triha1:96503	Trivi2:45882	Trias1:65584	Triat2:245984
		g2822/OTA01521.1	Trire2:46816	Trilo3:1434324	Trici4:1164680	S00021_99/OPB36181.1	Triha1:103121	Trivi2:201309	Trias1:151429	Triat2:35140
		-	-	-	-	S00011_28/OPB41188.1	Triha1:523343	-	-	-
		g4573/OTA02560.1	Trire2:108671	Trilo3:1426788	Trici4:1131194	S00018_59/OPB41736.1	Triha1:125453	Trivi2:200353	Trias1:133545	Triat2:79493
		-	-	-	-	S0000_2152/OPB38105.1	Triha1:105252	Trivi2:58670	Trias1:23916	Triat2:33115
Xylanases
GH10 Endo-ß-1,4-xylanase	EC 3.2.1.8	g9126/OTA05299.1	Trire2:120229	Trilo3:1325428	Trici4:1175971	S00001_770/OPB40690.1	Triha1:155799	-	Trias1:62499	-
		-	-	-	-	-	-	Trivi2:53264	-	Triat2:88310
		-	-	-	-	S00010_570/OPB45659.1	Triha1:91773	Trivi2:56652	Trias1:53366	-
GH11 Endo-ß-1,4-xylanase	EC 3.2.1.8	g12473/OTA07315.1	Trire2:74223	Trilo3:1379646	Trici4:152833	S00008.83/OPB46017.1	Triha1:525076	Trivi2:59409	Trias1:179571	Triat2:54856
		g2902/OTA01570.1	-	Trilo3:1426672	Trici4:1163377	S0008_371/OPB46304.1	Triha1:118868	Trivi2:65505	Trias1:83211	Triat2:46014
		g3179/OTA01738.1	Trire2:123818	Trilo3:1403397	Trici4:1134467	S00003_111/OPB43840.1	Triha1:115099	Trivi2:72838	Trias1:90115	Triat2:82355
		-	-	-	-	S00011_42/OPB41202.1	Triha1:127746	Trivi2:8282	Trias1:244563	Triat2:90109
GH30 Endo-ß-1,4-xylanase Clade A	EC 3.2.1.8	g2110/OTA01080.1	Trire2:111849	Trilo3:1355592	Trici4:1177495	S00010_550/OPB45639.1	Triha1:147762	Trivi2:59074	Trias1:193120	Triat2:40850
GH30 Endo-ß-1,4-xylanase Clade B		g128/OSZ99918.1	Trire2:69276	Trilo3:1471468	Trici4:1111950	S00003_50/OPB43779.1	Triha1:85618	Trivi2:32109	Trias1:194740	Triat2:47853
		-	-	-	-	S00001_779/OPB40699.1	Triha1:525481	Trivi2:53160	-	-
ß-xylosidases
GH3 Xylan-1,4-ß-xylosidase	EC 3.2.1.37	g2787/OTA01499.1	Trire2:121127	Trilo3:1406286	Trici4:1133892	S00021_167/OPB36249.1	Triha1:502198	Trivi2:29366	Trias1:62211	Triat2:161159
		g9679/OTA05621.1	Trire2:58450	Trilo3:1368415	Trici4:55459	S00001_921/OPB40840.1	Triha1:99736	Trivi2:192759	Trias1:198886	Triat2:161158
		-	-	-	-	S00002_154/ OPB38107.1	Triha1:495549	Trivi2:1299	-	-
Xyloglucanase
GH74 Xyloglucanase	EC 3.2.1.151	g11403/OTA06671.1	Trire2:49081	Trilo3:1329206	Trici4:1156740	S00008_564/OPB46497.1	Triha1:88968	Trivi2:59360	Trias1:54925	Triat2:87590
ß-mannanases
GH5 Endo-ß-1,4-mannanase	EC 3.2.1.78	g8748/OTA05078.1	Trire2:56996	Trilo3:1401669	Trici4:1117895	S00004_384/OPB42282.1	Triha1:111861	Trivi2:61403	Trias1:150477	Triat2:161120
		-	-	-	-	-	-	-	-	Triat2:54855
		g10481/OTA06101.1	Trire2:71554	Trilo3:1381765	Trici4:1202595	S00003_824/OPB44552.1	Triha1:99972	Trivi2:202252	Trias1:83171	Triat2:317063
GH26 Endo-ß-1,4-mannanase	EC 3.2.1.78	-	-	-	-	-	Triha1:79128	Trivi2:70926	-	-
		-	-	-	-	-	Triha1:110887	Trivi2:70925	-	-
α-galactosidase
GH27 α-1,4-galactosidase	EC 3.2.1.22	g1684/OTA00830.1	Trire2:65986	Trilo3:1363072	Trici4:1128649	S00011_306/OPB41463.1	Triha1:484731	Trivi2:195132	Trias1:202784	Triat2:52109
		g8401/OTA04865.1	Trire2:55999	-	Trici4:1165441	S00015_199/OPB39855.1	Triha1:249987	Trivi2:39916	Trias1:47755	Triat2:240154
		g218/OSZ99978.1	Trire2:72632	Trilo3:1401709	Trici4:1158884	S00009_403/OPB46961.1	Triha1:509041	Trivi2:76590	Trias1:59499	Triat2:51401
		-	-	-	-	S00003_136/OPB43865.1	Triha1:422216	Trivi2:145075	-	Triat2:207285
		-	-	-	-	-	-	Trivi2:151988	Trias1:205507	-
		g2262/OTA01181.1	Trire2:72704	Trilo3:8251	Trici4:22572	S00013_84/OPB44779.1	Triha1:150452	Trivi2:46494	Trias1:31758	Triat2:234784
		g2768/OTA01484.1	Trire2:59391	Trilo3:1141268	Trici4:1136835	S00021_200/OPB36281.1	Triha1:71962	Trivi2:27922	Trias1:449670	Triat2:33775
		g836/OTA00348.1	Trire2:27219	-	Trici4:54667	S00001_734/OPB40654.1	Triha1:94444	Trivi2:33738	Trias1:180019	Triat2:83919
		g7196/OTA04128.1	Trire2:75015	Trilo3:1398107	Trici4:1134118	S00015_195/OPB39851.1	Triha1:95162	Trivi2:39936	Trias1:141811	Triat2:80701
		g2291/OTA01204.1	Trire2:27259	Trilo3:1342436	Trici4:1171554	S00013_111/OPB44806.1	Triha1:93168	Trivi2:124849	Trias1:179044	Triat2:212860
GH36 α-1,4-galactosidase Clade A	EC 3.2.1.22	g5136/OTA02915.1	Trire2:64827	Trilo3:1331351	Trici4:1112676	S00003_572/OPB44301.1	Triha1:86247	Trivi2:33397	Trias1:140636	Triat2:296385
GH36 α-1,4-galactosidase Clade B		g8547/OTA04954.1	Trire2:124016	Trilo3:1394970	Trici4:1171580	S00013_41/OPB44736.1	Triha1:498608	Trivi2:46577	Trias1:1179128	Triat2:82772
α-arabinofuranosidase
GH43 α-L-arabinofuranosidase and ß-xylosidase	EC 3.2.1.55, EC 3.2.1.37	-	-	-	-	S00004_865/OPB42759.1	Triha1:507253	-	-	Triat2:2283200
		-	-	-	-	-	Triha1:1524872	Trivi2:47073	-	-
		g9528/OTA05539.1	Trire2:3739	Trilo3:1400271	Trici4:1129215	S00007_494/OPB36776.1	Triha1:1507253	Trivi2:56033	Trias1:155593	Triat2:2284598
		-	-	-	-	-	-	-	Trias1:1146120	Triat2:2242421
		g8472/OTA04914.1	Trire2:2109392	-	Trici4:122882	S00008_313/OPB46246.1	-	Trivi2:2128098	-	Triat2:2282567
		-	-	-	-	-	-	-	Trias1:165060	Triat2:177200
		-	-	-	-	-	-	-	Trias1:168907	Triat2:2161126
		g13597/OTA07992.1	Trire2:68064	Trilo3:1336377	Trici4:1191392	S00003_348/OPB44077.1	Triha1:1494994	Trivi2:262213	Trias1:158373	Triat2:155739
		-	-	-	-	-	-	-	Trias1:156700	Triat2:2309935
GH51 α-L-arabinofuranosidase	EC 3.2.1.55	-	-	-	-	-	-	-	Trias1:459604	Triat2:288680
GH54 α-L-arabinofuranosidase	EC 3.2.1.55	g739/OTA00284.1	Trire2:123283	Trilo3:1405026	Trici4:1128407	S00011_52/OPB41212.1	Triha1:513492	Trivi2:53036	-	-
		g9136/OTA05307.1	Trire2:55319	Trilo3:1324399	Trici4:1108957	S00002_153/OPB38106.1	Triha1:503269	Trivi2:48400	Trias1:55003	Triat2:127924
		-	-	-	-	-	-	-	Trias1:152723	Triat2:81098
GH62 α-L-arabinofuranosidase	EC 3.2.1.55	g61/OSZ99867.1	Trire2:76210	Trilo3:1397114	Trici4:153227	S00001_882/OPB40801.1	Triha1:513600	Trivi2:48966	Trias1:53918	Triat2:86518
		-	-	-	-	-	-	Trivi2:193266	-	-
		-	-	-	-	S00001_13/OPB39934.1	Triha1:93015	Trivi2:152027	Trias1:1138627	Triat2:219205
α glucuronidase
GH67 (xylan) α-1,2-glucuronidase	EC 3.2.1.131	g7131/OTA04089.1	Trire2:72526	Trilo3:1399114	Trici4:1128049	S00001_44/OPB39965.1	Triha1:509810	Trivi2:63208	Trias1:328757	Triat2:288788
		-	-	-	-	S00001_780/OPB40700.1	Triha1:21376	Trivi2:151713	Trias1:63024	Triat2:46613
GH115 α-(4-O-methyl)-glucuronidase	EC 3.2.1.-	g10124/OTA05875.1	Trire2:79606	Trilo3:18900	Trici4:1113491	S00007_37/OPB36320.1	Triha1:83158	Trivi2:45439	Trias1:186223	Triat2:87387
α-fucosidase
GH95 α-L-fucosidase	EC 3.2.1.51	g8065/OTA04650.1	Trire2:58802	Trilo3:1020683	Trici4:55121	S00001_1000/OPB40919.1	Triha1:273717	Trivi2:52642	Trias1:146605	Triat2:83589
		-	-	-	-	S00012_120/OPB42883.1	Triha1:477787	-	-	-
		-	-	-	-	S00003_152/OPB43881.1	Triha1:507955	Trivi2:62419	Trias1:90092	Triat2:143403
		g3219/OTA01766.1	Trire2:72488	Trilo3:1380523	Trici4:1190925	-	-	-	-	-
		g5017/OTA02843.1	Trire2:111138	Trilo3:1332208	Trici4:1177596	S00010_364/OPB45453.1	Triha1:497548	Trivi2:69649	Trias1:167317	Triat2:219941
		g2277/OTA01195.1	Trire2:5807	Trilo3:1342456	Trici4:1126261	S00013_103/OPB44798.1	Triha1:93968	Trivi2:67860	Trias1:93691	Triat2:50230
Pectinases
GH28 exo-polygalacturonase, rhamnogalacturonase,	EC 3.2.1.67, EC 3.2.1.171	g5045/OTA02860.1	Trire2:112140	Trilo3:1473611	Trici4:1186402	S00018_166/OPB41843.1	Triha1:486470	Trivi2:14392	Trias1:185790	Triat2:87581
		-	-	-	-	-	-	Trivi2:48906	-	-
		g844/OTA00354.1	-	-	Trici4:1120958	S00001_744/OPB40664.1	Triha1:541070	Trivi2:33554	-	Triat2:176492
		g12519/OTA07344.1	Trire2:122780	Trilo3:1266432	Trici4:1127208	S00008_608/OPB46541.1	Triha1:88799	Trivi2:127900	Trias1:74014	Triat2:217205
GH28 Polygalacturonase	EC 3.2.1.15	g12469/OTA07311.1	Trire2:103049	Trilo3:1358539	Trici4:1130809	S00008_85/OPB46019.1	Triha1:525077	Trivi2:51095	Trias1:204961	Triat2:83873
		-	-	-	-	-	-	Trivi2:192705	Trias1:151578	Triat2:28947
GH28 Exo-xylogalacturan hydrolase	EC 3.2.1.-	g4140/OTA02300.1	Trire2:108577	Trilo3:1461496	Trici4:1165967	S00005_149 /OPB37122.1	Triha1:77977	Trivi2:124605	Trias1:171354	Triat2:38139
		-	-	-	-	S00012_4 /OPB42767.1	Triha1:551823	-	-	-
		-	-	-	-	S00012_121 /OPB42884.1	Triha1:75047	-	-	-
GH78 α-L-rhamnosidase	EC 3.2.1.40	g9690/OTA05630.1	Trire2:58887	Trilo3:1368388	Trici4:1121408	S00001_931/OPB40850.1	Triha1:546580	Trivi2:192768	Trias1:82242	Triat2:43821
		-	-	-	-	S00011_27/OPB41187.1	Triha1:99295	Trivi2:53342	Trias1:41614	-
		-	-	-	-	-	-	-	Trias1:26963	Triat2:220087
		-	-	-	-	-	Triha1:501445	-	-	Triat2:268956
		-	-	-	-	-	-	-	Trias1:83956	-
		-	-	-	-	-	-	Trivi2:68030	-	-
Pectate lyase
PL1	EC 4.2.2.2	-	-	-	-	-	-	-	Trias1:40836	Triat2:161137
ß-galactosidases
GH35 ß-galactosidase	EC 3.2.1.23	g12841/OTA07539.1	Trire2:80240	Trilo3:1449314	Trici4:1193787	S00011_475/OPB41632.1	Triha1:222278	Trivi2:42143	Trias1:51088	Triat2:52125
ß-glucuronidase
GH79 β-(4-O-methyl)-glucuronidase	EC 3.2.1.31	g13247/OTA07787.1	Trire2:106575	Trilo3:1420839	Trici4:1186775	S00005_592/OPB37565.1	Triha1:3216	Trivi2:77255	Trias1:191352	Triat2:146878
		g2410/OTA01276.1	Trire2:71394	Trilo3:1434758	Trici4:1197794	S00004_791/OPB42685.1	Triha1:15655	Trivi2:71604	Trias1:67425	Triat2:214230
		g9688/OTA05629.1	Trire2:73005	Trilo3:1347166	Trici4:1121571	S00001_929/OPB40848.1	Triha1:127900	Trivi2:48997	Trias1:49498	Triat2:43063
		-	Trire2:72568	Trilo3:1457633	Trici4:1168165	S00019_167/ OPB43434.1	Triha1:495533	Trivi2:112103	Trias1:454421	Triat2:161139
Unsaturated ß-glucuronidase
GH88 Δ 4,5-unsaturated β-glucuronyl hydrolase		-	-	-	-	-	-	-	-	Triat2:28509
	EC 3.2.1	-	-	-	-	S00020_61/OPB41037.1	Triha1:10271	Trivi2:224428	-	-
		-	-	-	-	-	Triha1:101994	Trivi2:163488	-	-
		-	-	-	-	S00001_729/OPB40649.1	Triha1:541035	Trivi2:34630	Trias1:154058	Triat2:54915
Pectin Side chains
GH105 Unsaturated rhamnogalacturonyl hydrolase	EC 3.2.1.172	g11070/OTA06467.1	Trire2:57179	Trilo3:1356717	Trici4:52631	S00019_169/OPB43436.1	Triha1:520548	Trivi2:59912	Trias1:154479	Triat2:81365
ß-arabinobiosidase
GH121 ß-L-arabinobiosidase	EC 3.2.1.172	-	-	-	-	S00015_180/OPB39836.1	Triha1:9084	-	Trias1:32093	Triat2:54103
GH127 β-L-arabinofuranosidase Clade A	EC 3.2.1.185	g8930/OTA05190.1	Trire2:121475	Trilo3:1329598	Trici4:1109836	S00005_672/OPB37645.1	Triha1:3298	Trivi2:209784	Trias1:393413	Triat2:146811
GH127 β-L-arabinofuranosidase Clade B	EC 3.2.1.185	-	-	-	-	-	-	-	Trias1:205486	Triat2:91093
		-	-	-	-	S0001_967/OPB43334.1	Triha1:495654	-	-	-
Accessory proteins
AA9 copper-dependent lytic polysaccharide monooxygenase	N/A	g12723/OTA07470.1	Trire2:73643	Trilo3:1428884	Trici4:1158070	S00011_30/OPB41190.1	Triha1:99387	Trivi2:76869	Trias1:1462671	Triat2:43326
		g314/OTA00031.1	Trire2:120961	Trilo3:1396888	Trici4:1122402	S00009_97/OPB46655.1	Triha1:488374	Trivi2:111696	Trias1:32484	Triat2:54785
		g4240/OTA02361.1	Trire2:27554	Trilo3:1324833	Trici4:1155189	S00002_714/OPB38665.1	Triha1:131108	Trivi2:27891	Trias1:23357	Triat2:86311
Swollenin		g2111/OTA01081.1	Trire2:123992	Trilo3:1376720	Trici4:1123591	S00010_549/OPB45638.1	Triha1:484109	Trivi2:49838	Trias1:57959	Triat2:80187
Regulators
XYR1		g1816/OTA00903.1	Trire2:107776	Trilo3:1393861	Trici4:1133378	S00017_144/OPB37877.1	Triha1:83947	Trivi2:49232	Trias1:30111	Triat2:259849
ACE2		g10939/OTA06385.1	Trire2:78445	Trilo3:346401	Trici4:1120877	S00003_953/OPB44681.1	Triha1:513793	Trivi2:69287	Trias1:72138	Triat2:42504
ACE3		g6115/OTA03491.1	Trire2:77513	Trilo3:1208473	Trici4:1132611	S00007_550/OPB36832.1	Triha1:140772	Trivi2:199740	Trias1:454236	Triat2:319135

## Sheet: S3B Table
S3B Table. Distribution of pcwdCAZymes in GH families in Hypocreales
GH family	Th	Tgui	Tv	Tas	Tat	Tp	Tr	Tl	Tc	Ew	Cm	Man	Mac	Bb	Os	Fg	Fo	Nc	Ncr	Cg
GH5	4	4	4	4	4	3	3	3	3	5	7	8	8	7	2	13	22	18	6	10
GH6	1	1	1	1	1	1	1	1	1	0	0	0	0	0	1	1	1	1	3	4
GH7	2	2	2	2	2	2	2	2	2	1	0	0	4	0	0	2	3	2	5	6
GH12	3	3	4	3	3	2	2	2	2	2	0	0	0	0	1	1	4	6	2	4
GH45	1	2	1	1	1	1	1	1	1	0	0	0	0	0	0	1	1	1	1	2
GH1	4	2	2	2	4	2	2	2	2	2	2	4	4	2	0	4	6	5	1	1
GH3	17	19	17	17	16	15	13	13	13	10	9	7	6	10	3	22	32	38	11	13
GH10	2	2	2	2	1	1	1	1	1	0	0	0	0	1	0	5	5	3	4	7
GH11	4	4	4	4	4	3	3	3	3	0	0	0	0	0	0	2	3	3	2	9
GH30	3	3	3	2	2	2	2	2	2	0	0	0	0	0	0	1	3	0	2	2
GH74	1	1	1	1	1	1	1	1	1	1	0	0	0	0	5	1	6	5	6	9
GH26	2	0	2	0	0	0	0	0	0	0	0	0	0	0	0	0	0	0	1	1
GH27	9	11	10	9	9	8	8	6	8	1	1	2	2	2	0	2	3	1	0	2
GH36	1	2	1	1	1	1	1	1	1	1	2	2	1	2	1	3	2	1	0	0
GH43	4	4	4	6	8	3	3	2	3	1	2	1	1	2	1	17	30	32	7	16
GH51	0	0	0	1	1	0	0	0	0	0	0	0	0	0	0	2	2	1	1	1
GH54	2	2	2	3	3	2	2	2	2	0	1	1	0	1	0	1	1	1	1	0
GH62	2	2	2	2	2	1	1	1	1	0	0	0	0	0	0	1	1	2	0	4
GH67	2	2	2	2	2	1	1	1	1	1	0	0	0	0	0	1	2	0	1	1
GH95	4	5	4	4	4	4	4	4	4	3	0	0	0	1	0	2	2	3	0	1
GH28	6	7	6	5	6	5	4	3	5	1	0	0	0	0	1	6	15	11	2	1
GH35	1	7	1	1	1	1	1	1	1	1	3	2	1	3	1	3	6	8	2	2
GH78	2	1	2	4	3	1	1	1	1	0	0	0	0	0	0	6	16	11	1	1
GH79	4	2	4	4	4	4	4	4	4	1	3	2	2	2	0	1	6	1	2	4
GH88	3	2	3	1	2	0	0	0	0	1	1	1	0	1	0	1	3	5	0	0
GH105	2	1	2	2	2	2	2	2	2	0	0	1	0	0	1	2	3	4	2	1
GH115	1	1	1	1	1	1	1	1	1	1	1	1	0	0	0	2	2	2	1	2
GH121	1	1	0	1	1	0	0	0	0	1	1	1	1	1	1	1	1	1	1	1
GH127	2	2	1	2	2	0	0	0	0	1	1	2	2	1	1	2	1	3	0	1
	90	95	88	88	91	67	64	60	65	35	34	35	32	36	19	106	182	169	65	106
GH - glycosyl hydrolase
colors indicate conditional formationg from large (red) to low (green)
Species abbreviated as:
Th	T. harzianum				Cm	Cordyceps militaris
Tgui	T. guizhouense				Man	Metarhizium anisopliae
Tv	T. virens				Mac	Metarhizium acridum
Tas	T. asperellum				Bb	Beauveria bassiana
Tat	T. atroviride				Os	Ophiocordyceps sinensis
Tp	T. parareesei				Fg	Fusarium graminearum
Tr	T. reesei				Fo	Fusarium oxysporum
Tl	T. longibrachiatum				Nc	Nectria cinnabarina
Tc	T. citrinoviride				Ncr	Neurospora crassa
Ew	Escovopsis weberi				Cg	Chaethomium globosum

## Sheet: S3C Table
S3C Table: Parameters of phylogenetic analyses of individual proteins from Trichoderma pcwdCAZome
		Number of OTUs	Length of the original alignment	Length of aligned fragment after Gblocks	% of aligned fragment that was retained after selecting only well-conserved region	Number of generations (MrBayes) /states(BEAST2), million	Tree length
							Mean tree length	Variance
Phylogenomic tree (100 orthologous proteins)		23	70289	47653	67.90	3.9	2.055827	5.11208E-05
Multiloci phylogeny of Ascomycota fungi		128	3330	2427	72.88	3	12.4602	0.00499909
Cellulases	GH6 Cellobiohydrolase CEL6	33	635	524	83	1	7.45758	0.0215367
	GH7 Endo-ß-1,4-glucanase CEL7B	34	608	608	100	1	7.26945	0.0390807
	GH7 Cellobiohydrolase CEL7A	80	969	483	49.8452	1	9.48027	0.0226933
	GH5 endo ß 1-4 glucanase Clade A	99	989	713	72.093	1	24.2524	0.0705507
	GH5 endo ß 1-4 glucanase Clade B	65	1065	921	86.4789	10	30.2978	0.0892874
	GH5 endo ß 1-4 glucanase Clade C	23	547	428	78.245	1	3.40487	0.00961942
	GH12 endo ß 1-4-glucanase Clade A	46	262	262	100	1	7.75117	0.0391501
	GH12 endo ß 1-4-glucanase Clade B	43	397	369	92.9471	1	7.37163	0.0277244
	GH45 endo ß 1-4 glucanase	34	378	329	87.037	1	8.15759	0.0572622
ß-glucosidases	GH1 ß 1-4 glucosidase Clade A	20	528	480	90.9091	1	1.56896	0.00368386
	GH1 ß 1-4 glucosidase Clade B	21	1320	666	50	1	4.46727	0.008886
	GH1 ß 1-4 glucosidase Clade C	25	772	485	62.8238	1	2.62584	0.00612829
	GH3-ß glucosidase	242	1552	965	62	3	35.7467	0.062056
Xylanases	GH10 endo ß 1-4 xylanase	67	584	315	54	1	8.90378	0.0317516
	GH11 endo ß 1-4 xylanase	55	1063	333	31.3264	1	6.79891	0.0305366
	GH30 endo ß 1-4 xylanase Clade A	42	1092	1064	97.4359	1	4.16941	0.00975772
	GH30 endo ß 1-4 xylanase Clade B	33	586	480	81.9113	1	4.49194	0.0108645
ß xylosidase	GH3-ß xylosidase	104	1432	1311	91.5503	2	16.768	0.0269156
Xyloglucanase	GH74 xyloglucanase	80	1949	1010	51.8214	1	13.3452	0.0187212
ß-mannanases	GH5 endo ß 1-4 mannanase	46	667	654	98.051	1	11.4769	0.0487781
	GH26 endo ß 1-4 mannanase	21	762	329	43.1759	1	5.56574	0.0279909
α-galactosidase	GH27 α 1-4 galactosidase	173	3327	853	25.6387	5	31.3359	0.0929713
	GH36 α 1-4 galactosidase Clade A	54	944	944	100	1	12.42	0.0191498
	GH36 α 1-4 galactosidase Clade B	44	754	754	100	1	4.45324	0.00666745
α-arabinofuranosidase	GH43 α-L arabinofuranosidase and ß-xylosidase	123	2080	809	38.8942	3	36.8704	0.21489
	GH51 α-L arabinofuranosidase	16	1493	670	44.8761	1	19.4045	0.0437434
	GH54 α-L arabinofuranosidase	90	567	522	92.0635	1	8.22671	0.0175114
	GH62 α-L arabinofuranosidase	58	891	312	35.6902	1	6.72331	0.0238445
α glucuronidase	GH67 (xylan) α-1-2 glucuronidase	57	922	888	96.3124	1	10.5892	0.0143023
	GH115 α-(4-O-methyl) glucuronidase	52	1103	1103	100	1	11.7098	0.015339
α-fucosidases	GH95 α-L fucosidase	94	2455	922	37.556	1	23.4998	0.0417067
Pectinases	GH28 exo-polygalacturonase and rhamnogalacturonase	54	614	418	68.0782	1	10.4636	0.0337702
	GH28 Polygalacturonase	27	392	392	100	1	2.80015	0.00805338
	GH28 exo-xylogalacturan hydrolase	37	941	576	61.2115	1	11.3884	0.0881165
	GH78 α-L rhamnosidase	57	2682	1099	40.9769	1	10.5892	0.0143023
Pectate Lyase	PL1	14	851	346	40.658	1	2.16549	0.00714933
ß-galactosidases	GH35 ß-galactosidase	27	1175	1175	100	1	3.77536	0.00457161
ß-glucuronidase	GH79 β-(4-O-methyl)-glucuronidase	56	1256	618	49.2038	1	10.6913	0.0278159
Unsaturated ß-glucuronidase	GH88 Δ-4,5 unsaturated β glucuronyl hydrolase	75	1212	507	41.8317	1	17.975	0.0553617
Unsaturated rhamnogalacturonyl hydrolase	GH105 Unsaturated rhamnogalacturonyl hydrolase	26	383	383	100	1	2.3348	0.00687404
ß-arabinobiosidase	GH121 ß-L arabinobiosidase	12	1338	910	68.2119	1	3.7488	0.00839916
	GH127 ß-L arabinofuranosidase Clade A	70	1780	801	45	1	19.3959	0.0395297
	GH127 ß-L arabinofuranosidase Clade B	40	1727	691	40	1	8.06925	0.0143918
Accessory proteins	AA9 (formerly "GH61") Copper-dependent lytic polysaccharide monooxygenase	88	1097	574	52.3245	1	55.8697	0.218536
	Swollenin	23	734	527	71.7984	1	7.65312	0.0499811
lclCAZyme regulator genes	XYR1	57	328	328	100	1	5.78171	0.0202017
	ACE2	15	575	393	68.3478	1	8.1813	0.0540773
	ACE3	17	776	714	92.0103	1	2.54383	0.00973243
