# Supplementary material for: Massive lateral transfer of genes encoding plant cell wall-degrading enzymes to the mycoparasitic fungus Trichoderma from its plant-associated hosts
Source: PLoS Genet. 2018 Apr 9;14(4):e1007322. doi: 10.1371/journal.pgen.1007322 (PMC5908196; doi:10.1371/journal.pgen.1007322)
Supplement: S6 Table — (XLSX) [file pgen.1007322.s007.xlsx]

## Sheet: S6 Table 
S6 Table. Additional organisms used in this study
	TU CIM	Other collection identifiers or refs.	DNA barcode / NCBI Accession
Living fungi
Trichoderma reesei	4817	GFP-labeled, R. Linke, unpublished	tef1 / Z23012
T. guizhouense	4741	GFP-labeled, 1	tef1 / S00002_764
T. simonsii	6527	this study	tef1 / Y274484
Emericellopsis alkalina	2964		ITS1 and 2 rRNA / KY031970
F. oxysporum	4301	1
Pestalotiopsis fici	5788	this study	ITS1 and 2 rRNA / KX519719
Penicillium sp.	5710		ITS1 and 2 rRNA / KY092664
Penicillium sp.	5713		ITS1 and 2 rRNA / KY092665
Penicillium sp.	5718		ITS1 and 2 rRNA / KY092666
Penicillium sp.	5764		ITS1 and 2 rRNA / KY092667
Penicillium sp.	5766		ITS1 and 2 rRNA / KY092668
Penicillium sp.	5767		ITS1 and 2 rRNA / KY092669
Penicillium sp.	5768		ITS1 and 2 rRNA / KY092670
Penicillium sp.	5810		ITS1 and 2 rRNA / KY092671
Penicillium sp.	5830		ITS1 and 2 rRNA / KY092672
Alternaria alternata	3737	1	ITS1 and 2 rRNA / KP292618
Thanatephorus solani	4075		ITS1 and 2 rRNA / KP292619
Sclerotinia sclerotiorum	3740		ITS1 and 2 rRNA / KP292616
Leucoagaricus gongylophorus	6525	CBS 627.89/MACS 98	ITS1 and 2 rRNA / KY026054
Lentinula edodes	4821	this study	ITS1 and 2 rRNA / KY213658
Source of dead biomass
Shorea johorensis	5512	this study	maturase K / KY274483
Ganoderma lucidum	6529		N/A
tef1 - translation elongation factor 1 a, partial sequence
ITS 1 and 2 rRNA - internal transcribed spacers 1 and 2 of the rRNA gene cluster, complete sequence
TU CIM - TU Wien Collection of Industrial Microorganisms, TU Wien, Vienna, Austria
Reference:
1 Zhang, J. et al. The neutral metallopeptidase NMP1 of T richoderma guizhouense is required for mycotrophy and self-defence: NMP1 of the fungicidal mould Trichoderma guizhouense. Environ. Microbiol. n/a-n/a (2015). doi:10.1111/1462-2920.12966
